# Supplementary material
Source: Springer Nature journal article supplement (https://www.springermedizin.de/resource/supplementary/12889_2009_1715_MOESM2_ESM.pdf/9503816)

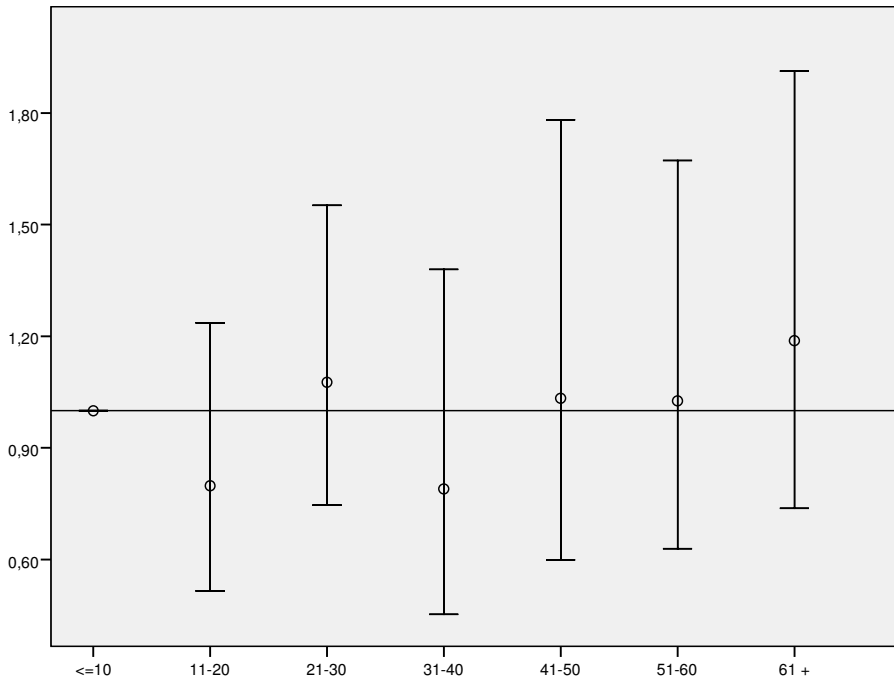

Supplement: MOESM2 [file 9503816]
